# Supplementary material for: Impact of augmented renal clearance on piperacillin and meropenem exposure in critically ill adult burn patients: a prospective observational study
Source: Research Square preprint supplement (doi:10.21203/rs.3.rs-8768792/v1), 2026-02-10
Supplement: Supplementary file 1 [file 2c7e63a31923859946cf1ca8.docx]

# Supplementary APPENDIX

### Institutional guideline regarding antimicrobial dosing (excerpt)

| **Meropenem** |  |  |  |  |  |
| --- | --- | --- | --- | --- | --- |
| Renal function (ml/min/m2) | >50 | 10-50 | <10 | IHD | CRRT |
| Dosing | 2g q8h | 2g q12h | 1g q12h | 2g q24h | 2g q12h |
| **Piperacillin + tazobactam** |  |  |  |  |  |
| Renal function (ml/min/m2) | >20 | 10-20 | <10 | IHD | CRRT |
| Dosing | 4.5g q6h | 4.5g q8h | 2.25g q8h | 2.25g q8h | 4.5g q8h |

Drugs are diluted to 50 ml with 0.9% NaCl and infused over 4h. At the initiation of antimicrobial therapy, a bolus dose is recommended (4.5 g for piperacillin/tazobactam and 2 g for meropenem). Adjustment to renal function is discouraged in the first 48 hours.

### Therapeutic drug monitoring

For antibiotic assays, trough samples were obtained within 15 minutes before the next scheduled dose. Meropenem and piperacillin concentrations were determined in serum using liquid chromatography with ultraviolet absorbance detection. A single tube of native blood sample was collected into a red-top phlebotomy tube. The sample was centrifuged at 2500g for 10 min, and 0.5 mL supernatant was transferred to a secondary tube which was subsequently stored and transported to the assaying laboratory at -18 °C. Care was taken to present the samples to the assaying laboratory within six hours after blood collection. The samples were allowed to thaw without applying heat, sample preparation took place within 30 minutes of sample receipt, and analysis followed without delay.

Sample preparation and analysis was performed using the Chromsystems Antibiotics in serum/plasma HPLC reagent kit (cat. 61000), the Chromsystems 3PLUS1 Multilevel Plasma Calibrator Set (cat. 61028), the Chromsystems Antibiotics in serum/plasma Plasma controls level I and II (cat. 0183 and 0184, respectively), and the Chromsystems Antibiotics in serum/plasma HPLC column (cat. 61100, ABL&E-Jasco Magyarország Kft., Budapest, Hungary). The procedure of sample preparation and analysis was conducted as described in the Chromsystems Instruction manual for HPLC determination, Antibiotics in serum/plasma (Chromsystems GmbH, Gräfelfing, Germany).

In the pretreatment process, 200 µL Chromsystems Internal Standard Mix (cat. 61004) was added to 100 µL sample. The mixture was vortexed intensively for 1 min, followed by centrifugation at 15,000 x g for 5 min. 100 µL supernatant was mixed with 100 µL Chromsystems Dilution Buffer (Cat. 61005), and was submitted for analysis.

The analysis was performed on a JASCO series 4000 high-performance liquid chromatograph containing a PU-4180 quaternary pump, an AS-4050 autosampler, a Jetstream column thermostat and a UV-4090 diode array detector. The autosampler tray was cooled to 10 °C, and the analytical column was thermostatted at 22 °C. The mobile phase flow rate was 1.0 mL/min.

The chromatographic separation of meropenem was achieved by using Chromsystems Mobile Phases ‘A’ and ‘B’ (cat. 61001 and 61002, respectively) and the following gradient program (% B): initial, 0%; 8.00 min, 0%; 8.01 min, 100%; 10.00 min, 100%; 10.01 min, 0%. The run time was 13 min. The injection volume was 5 µL. Meropenem and the internal standard were detected at 290 nm and 210 nm, respectively.

Piperacillin was assayed in an isocratic run using Chromsystems Mobile phase ‘B’ (cat. 61002). The run time was 5 min, the injection volume was 10 µL, and the detection wavelength was 252 nm.

Chromatographic peak areas were used for quantitation. The calibration model was linear with 1/concentration2 weights. Internal quality control was accomplished using the Chromsystems Antibiotics in serum/plasma Plasma controls level I and II (cat. 0183 and 0184, respectively). Calibrators and internal controls were prepared and analyzed along with, and in exactly the same manner as patient samples. Calibration and control runs were conducted at the beginning of each analytical batch.

Because literature reports variable total-to-unbound ratios for piperacillin, we applied a correction factor of 0.87 to total concentrations, based on the measurements of *Olbrisch et al.* in critically ill burn patients, to estimate unbound levels as direct measurement was not available (28). In the following piperacillin concentrations are referred as unbound concentrations with the above factor applied. As the plasma protein binding of meropenem is low, around 2%, no reduction factor was applied. Tazobactam concentrations were not measured to reduce complexity and as high correlation was found between piperacillin and tazobactam in previous studies on ICU patients (29).

**TABLES**

**Supplementary Table 1. Comparisons of Clinical Variables with β-lactam Exposure**

| **Variable** | **Spearman rank**  **correlation coefficients (95% CI)** | **Odds ratios (95% CI)** | **p-value** |
| --- | --- | --- | --- |
| **Renal function measurements** | | | |
| Creatinine clearance  (urine creatinine based estimation) | ρ -0.52 (-0.66–-0.34) |  | p<0.001 |
| Plasma creatinine | ρ 0.42 (0.22–0.57) |  | p<0.001 |
| Creatinine clearance  (Cockcroft-Gault equation) | ρ -0.5 (-0.64–-0.32) |  | p<0.001 |
| Presence of AKI |  | OR 15.62 (2.22–684.07) | p<0.001 |
| Urine output (ml/kg/24h) | ρ -0.35 (-0.52–-0.14) |  | p=0.001 |
| Presence of ARC |  | OR 0.21 (0.06–0.67) | p=0.003 |
| ARC by ARCTIC score |  | OR 0.24 (0.05–0.85) | p<0.014 |
| **Sequential Organ Failure Assessment (SOFA) and subscores** | | | |
| SOFA | ρ 0.66 (0.43–0.81) |  | p<0.001 |
| Renal | ρ 0.5 (0.32–0.64) |  | p<0.001 |
| Cardiovascular | ρ 0.31 (0.08–0.5) |  | p<0.009 |
| Respiratory | ρ 0.44 (0.25–0.6) |  | p<0.001 |
| Coagulation | ρ 0.12 (-0.1–0.33) |  | p=0.294 |
| Central nervous system | ρ 0.32 (0.11-0.5) |  | p<0.003 |
| Liver | ρ 0.27 (-0.02–0.53) |  | p<0.071 |
| **Sequential Organ Failure Assessment 2 (SOFA-2) and subscores** | | | |
| SOFA-2 | ρ 0.64 (0.4–0.8) |  | p<0.001 |
| Renal | ρ 0.5 (0.32–0.64) |  | p<0.001 |
| Cardiovascular | ρ 0.28 (0.05-0.48) |  | p=0.017 |
| Respiratory | ρ 0.35 (0.15–0.53) |  | p=0.001 |
| Coagulation | ρ 0.12 (-0.1–0.33) |  | p=0.269 |
| Central nervous system | ρ 0.32 (0.11-0.5) |  | p<0.003 |
| Liver | ρ 0.34 (0.04–0.58) |  | p=0.071 |
| **Biomarkers** | | | |
| C-Reactive Protein | ρ 0.43 (0.21–0.61) |  | p<0.01 |
| Procalcitonin | ρ 0.20 (-0.02-0.4) |  | p=0.072 |
| Platelet count | ρ -0.22 (-0.42–-0.0) |  | p=0.046 |
| Bilirubin | ρ 0.3 (0.01-0.55) |  | p=0.045 |
| Albumin | ρ -0.02 (-0.26 – 0.22) |  | p=0.788 |

**Supplementary Table 2. Target attainment of meropenem and piperacillin with various PK/PD targets**

| **PK/PD target** | **All**  (n=84 samples) | **Meropenem**  (n=59 samples) | **Piperacillin**  (n=25 samples) | **Odds ratio (95% CI)** | **p-value** |
| --- | --- | --- | --- | --- | --- |
| **100% fT > 1x isolate MIC** | 78 (92.9%) | 54 (91.5%) | 24 (96.0%) | 0.45 (0.03–4.89) | 0.665 |
| **100% fT > 4x isolate MIC** | 71 (84.5%) | 52 (88.1%) | 19 (76.0%) | 2.35 (0.63–9.63) | 0.192 |
| **100% fT > 1x breakpoint MIC** | 55 (65.5%) | 35 (59.3%) | 20 (80.0%) | 0.36 (0.10–1.21) | 0.083 |
| **100% fT > 4x breakpoint MIC** | 17 (20.2%) | 14 (23.7%) | 3 (12.0%) | 2.28 (0.36–25.6) | 0.371 |

**Supplementary Table 3. All-cause ICU mortality and target attainment**

| PK/PD target | All-cause ICU mortality (n, %) | | OR (95% CI) | *p-*value |
| --- | --- | --- | --- | --- |
| ***Patients with any subtherapeutic samples*** | ***Patients with all samples above PK/PD target*** |
| 100% fT>1× breakpoint MIC | 0/12 (0.0%) | 9/12 (75.0%) | 0.015 (0.0007–0.321) | <0.001 |
| 100% fT>4× breakpoint MIC | 7/22 (31.8%) | 2/2 (100.0%) | 0.097 (0.004–2.28) | 0.130 |
| 100% fT>1× isolate MIC | 0/5 (0.0%) | 9/19 (47.4%) | 0.10 (0.0049–2.07) | 0.118 |
| 100% fT>4× isolate MIC | 0/7 (0.0%) | 9/17 (52.9%) | 0.059 (0.0029–1.21) | 0.022 |

CI: confidence interval, MIC: minimum inhibitory concentration, OR: Odds ratio

**Supplementary Table 4. Target attainment with and without augmented renal clearance. Renal function estimated by Cockcroft-Gault equation.**

| PK/PD target | Overall  (n=84 samples) | ARC  (n=25 samples) | No-ARC  (n=59 samples) | Odds ratio (95% CI) | p-value |
| --- | --- | --- | --- | --- | --- |
| 100% fT > 1× isolate MIC | 78 (92.9%) | 22(88.0%) | 56(94.9%) | 0.39 (0.07-2.10) | 0.356 |
| 100% fT > 4x isolate MIC | 71(84.5%) | 21(84.0%) | 50(84.7%) | 0.94 (0.26-3.41) | 1.0 |
| 100% fT > 1x breakpoint MIC | 55(65.5%) | 12(48.0%) | 43(72.9%) | 0.34 (0.13-0.91) | 0.004 |
| 100% fT > 4x breakpoint MIC | 17(20.2%) | 3(12.0%) | 14(23.7%) | 0.44 (0.11-1.69) | 0.373 |
